# Supplementary material for: Ecological River Health Assessment Using Multi-Metric Models in an Asian Temperate Region with Land Use/Land Cover as the Primary Factor Regulating Nutrients, Organic Matter, and Fish Composition
Source: MDPI journal article supplement (doi:10.3390/ijerph19159305), 2022-07-29
Supplement: s1 [file s1]

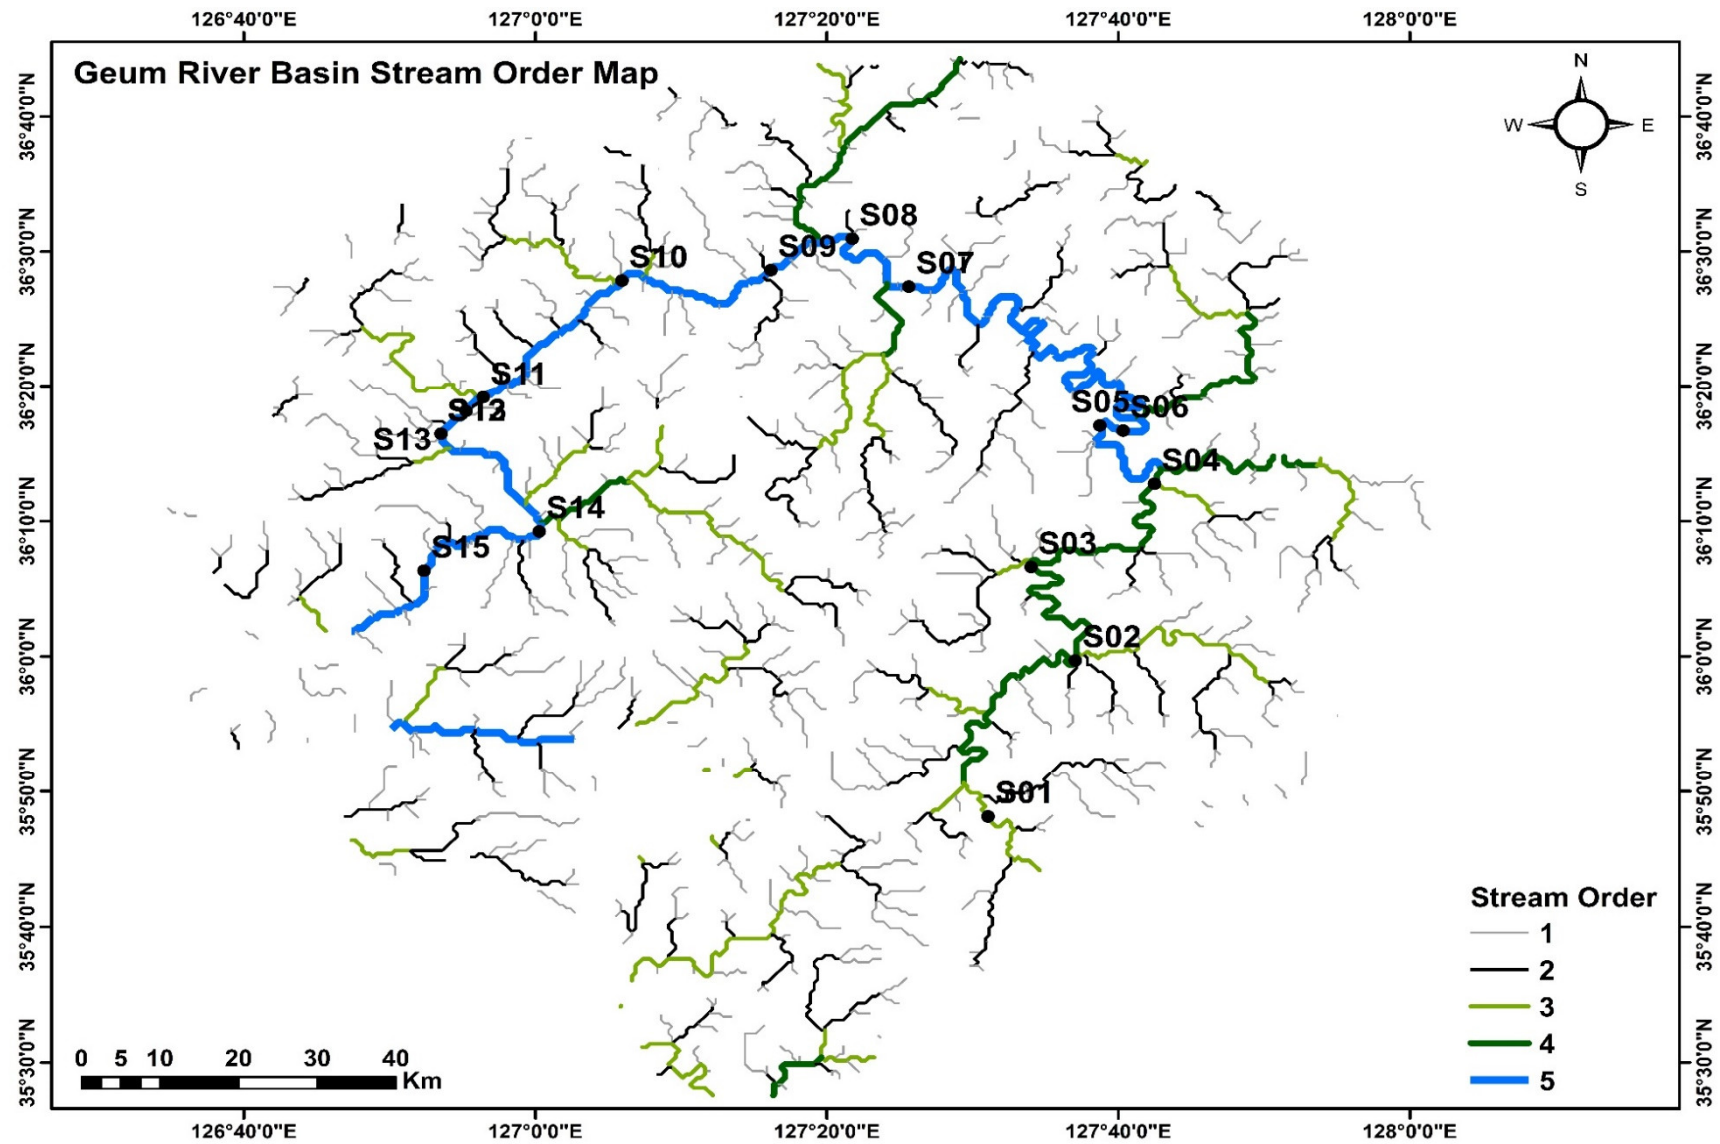

Figure S1. Map showing the stream order of the Geum River basin

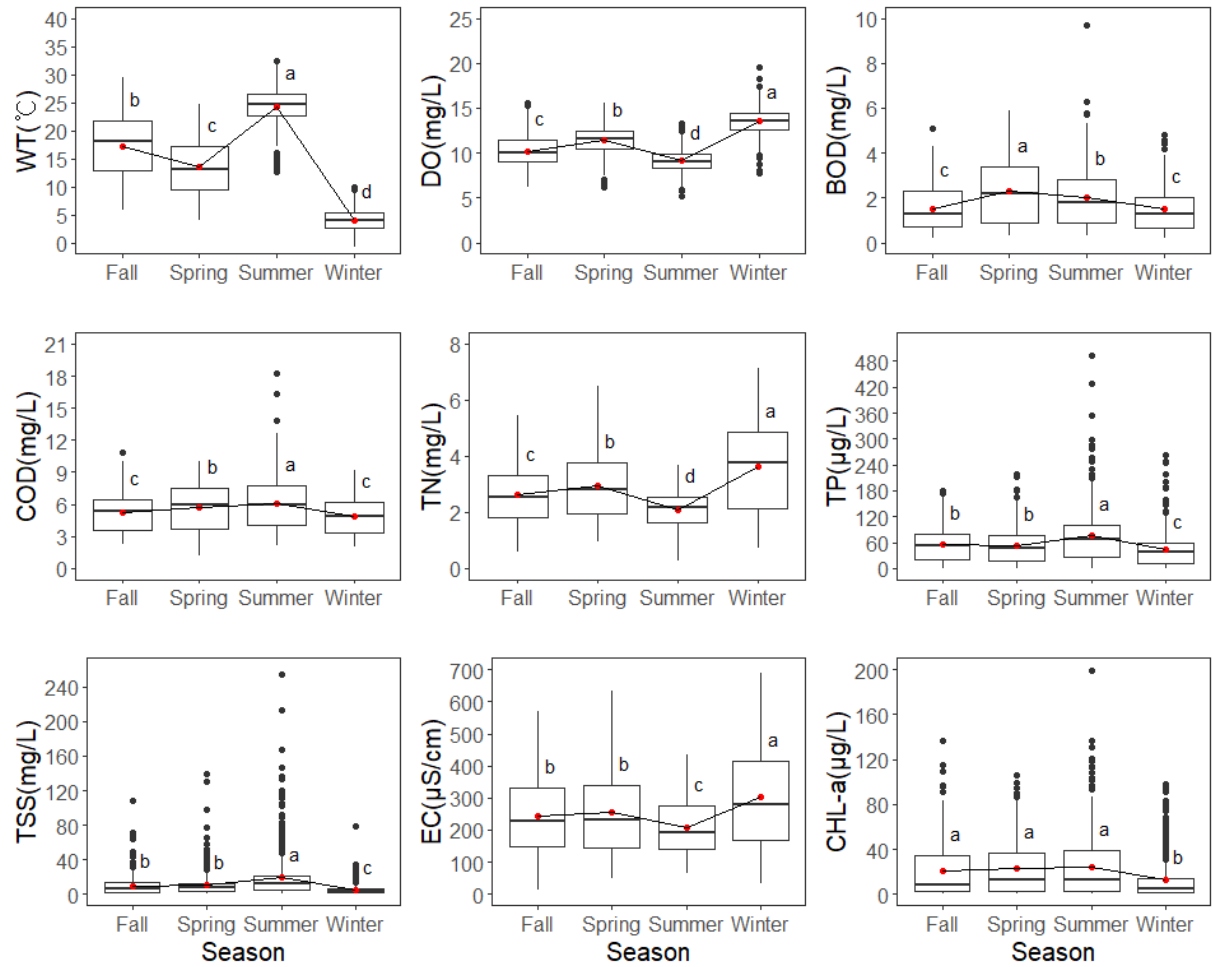

Figure S2. Seasonal variations of water quality parameters in the Geum River basin (WT: water temperature, DO: dissolved oxygen, BOD: biological oxygen demand, COD: chemical oxygen demand, TP: total phosphorus, TN: total nitrogen TSS: total suspended solids, EC: electrical conductivity and CHL-a: chlorophyll-a, Spring: Mar-May, Summer: Jun-Aug, Fall: Sep-Nov, Winter: Dec-Feb, the red dots indicate the mean value)

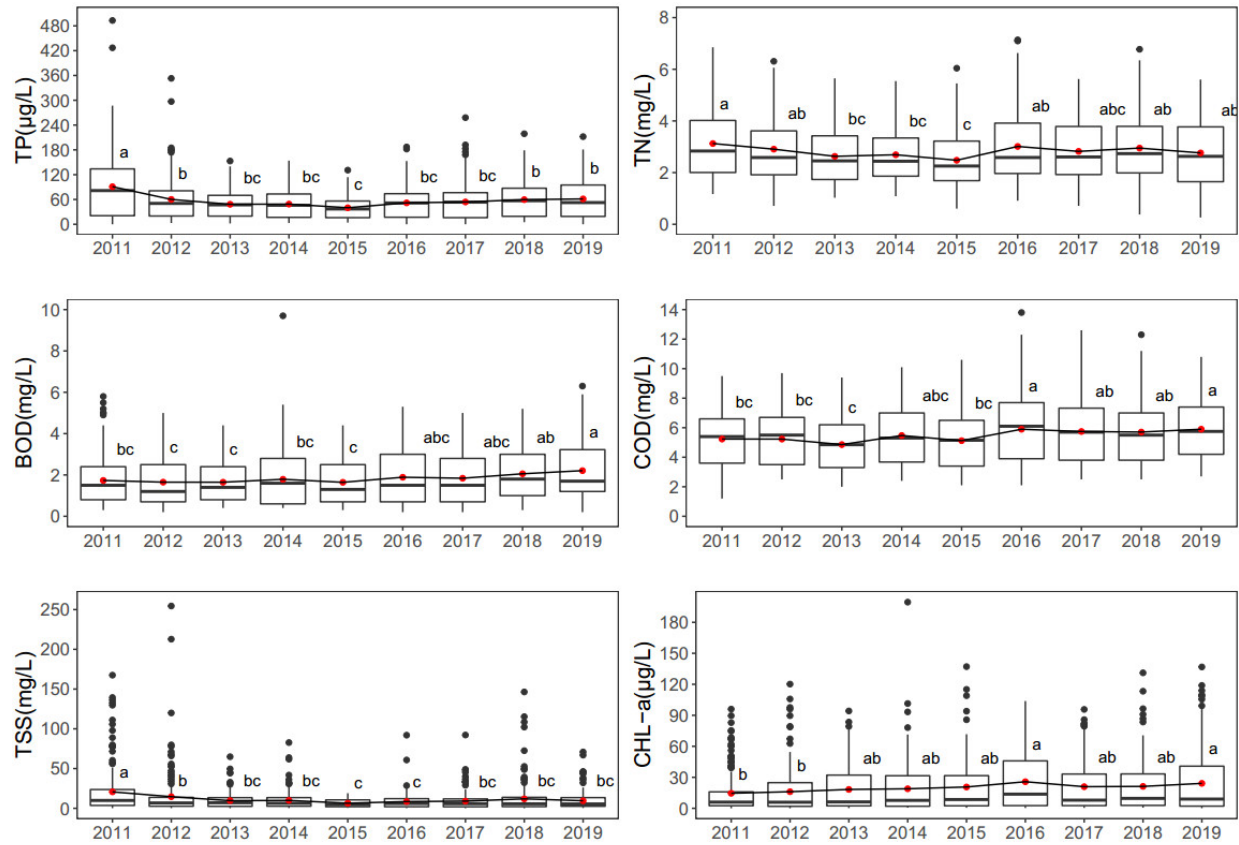

Figure S3. Yearly variations of water quality variables in the Geum River basin (TP: total phosphorus, TN: total nitrogen, BOD: biological oxygen demand, COD: chemical oxygen demand, TSS: total suspended solids, and CHL-a: chlorophyll-a, the red dots indicate the mean value)

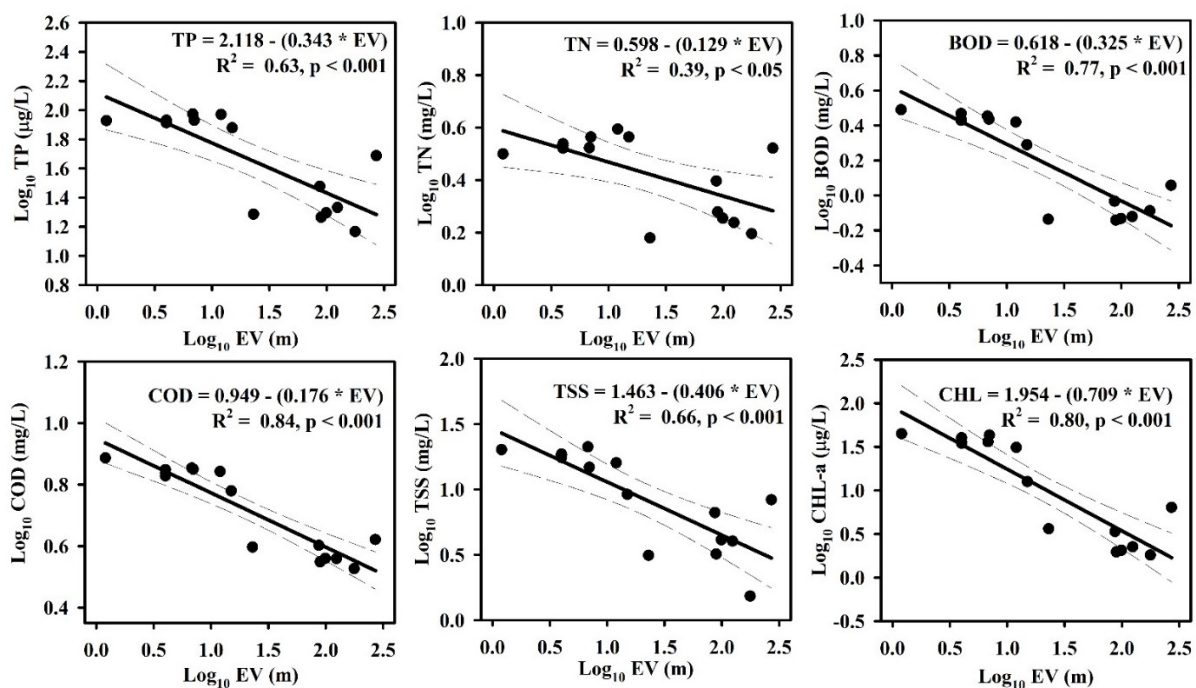

Figure S4. Relations of nutrients (TP: total phosphorus, TN: total nitrogen), organic matters (BOD: biological oxygen demand, COD: chemical oxygen demand), total suspended solids (TSS) and chlorophyll-a with elevation (EV) in the Geum River basin

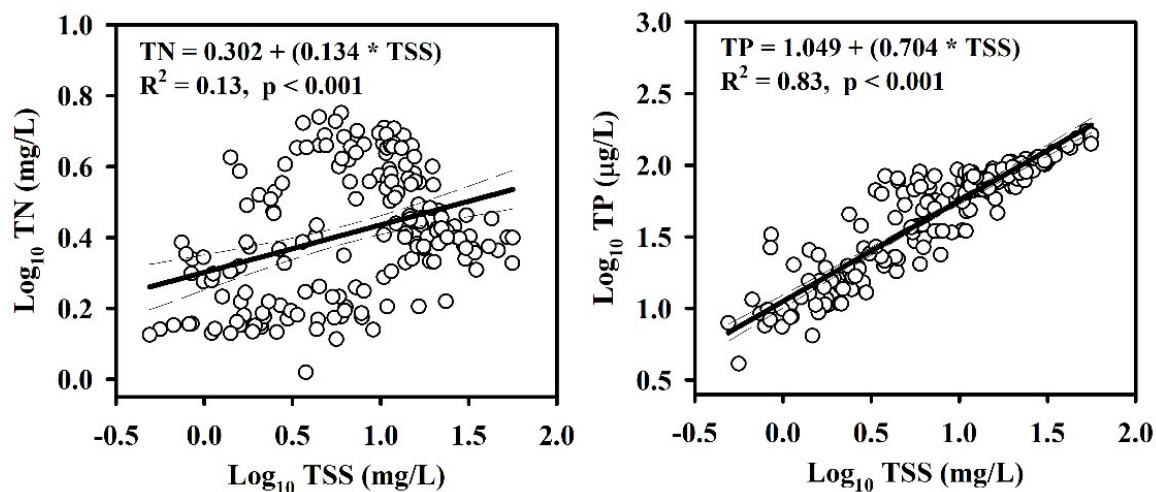

Figure S5. Relations of suspended solids with nutrients (TP: total phosphorus, TN: total nitrogen)

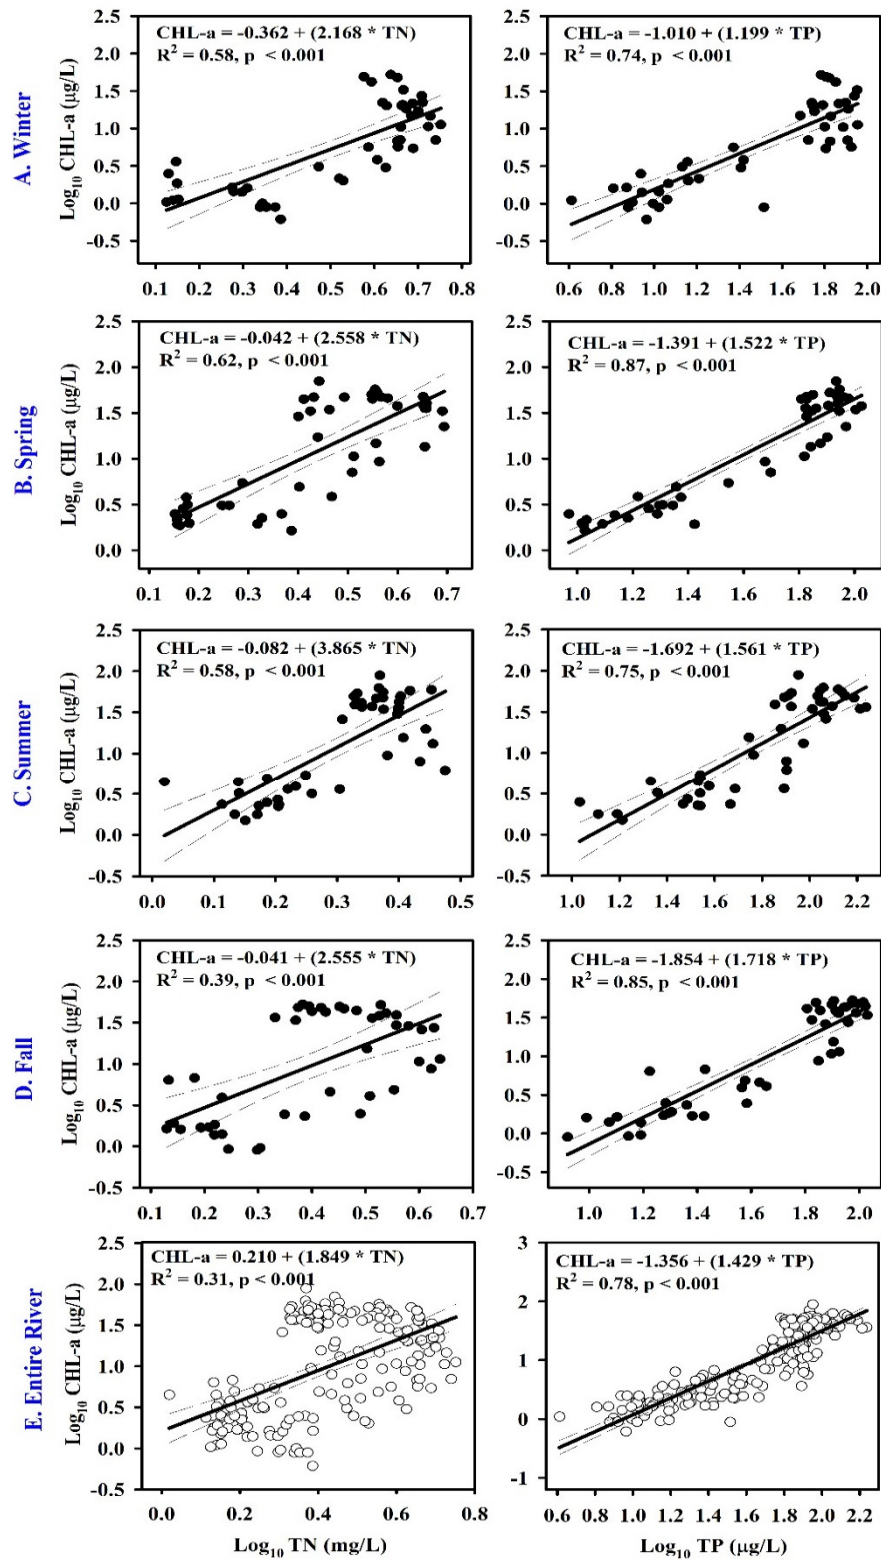

Figure S6. Relations of algal chlorophyll (CHL-a) with total nitrogen (TN) and total phosphorus (TP) in the Geum River (Spring: Mar-May, Summer: Jun-Aug, Fall: Sep-Nov, Winter: Dec-Feb)



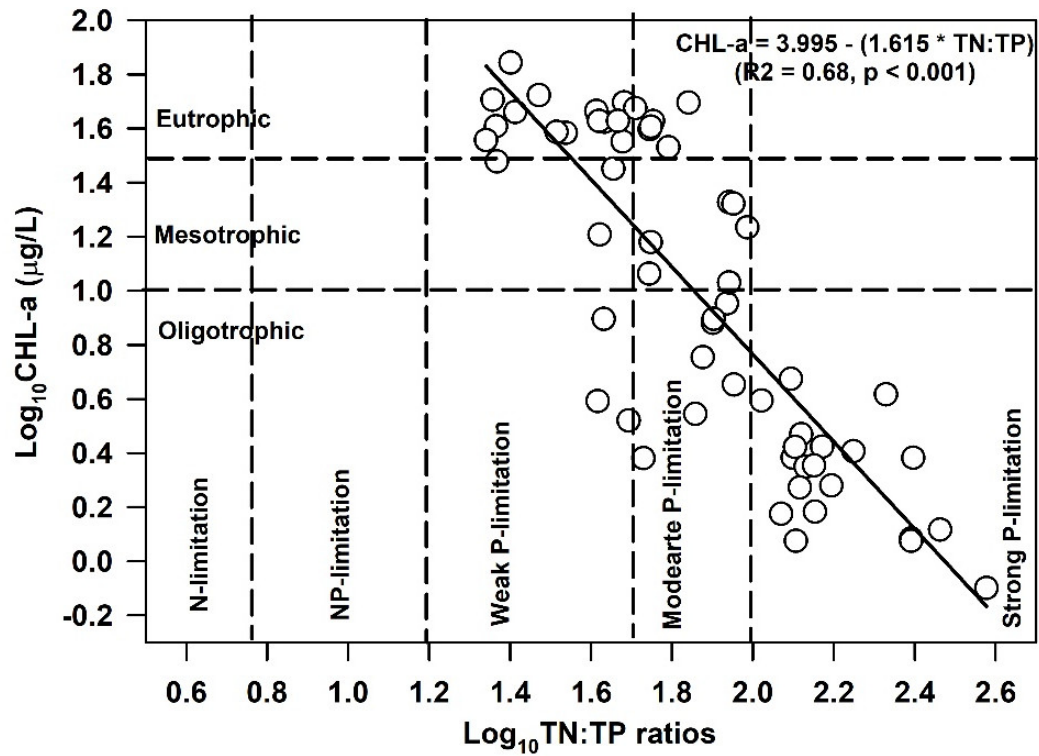

Figure S7. Nutrient limitation status determination based on the empirical relationship of algal chlorophyll (CHL-a) with TN:TP ratios.

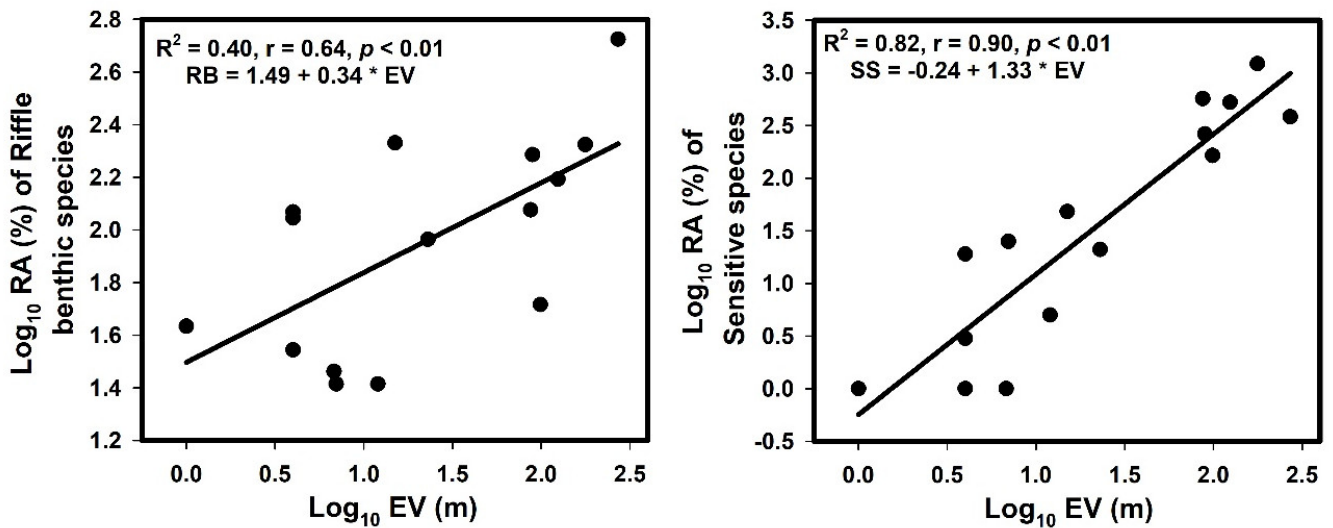

Figure S8. Relations of riffle benthic and sensitive fish species with elevation.

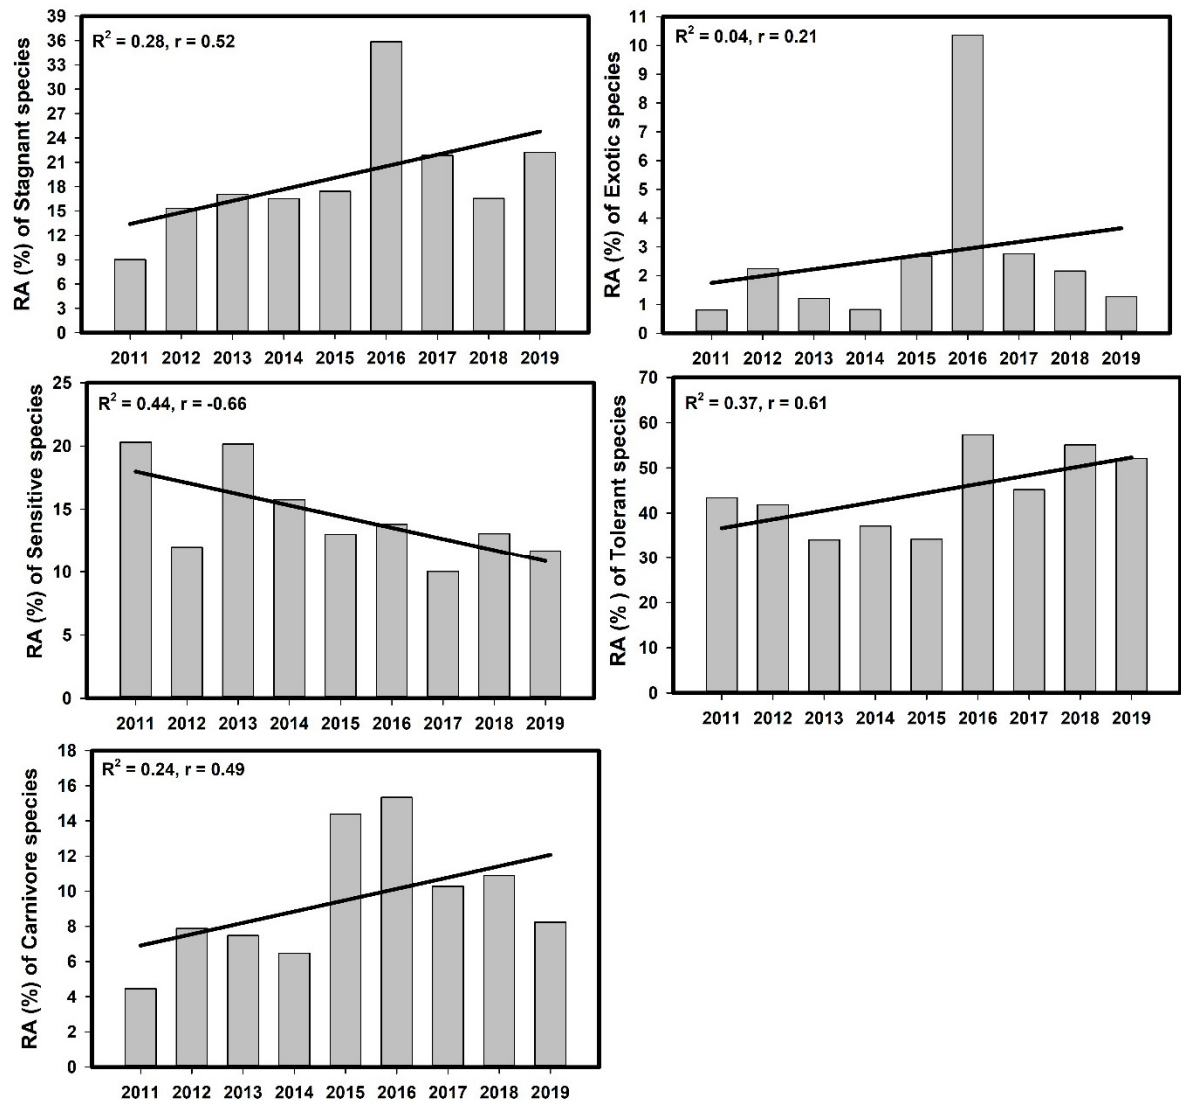

Figure S9. Yearly variations of stagnant, exotic, sensitive, tolerant, and carnivore fish species in the Geum River (the black line indicates the regression line)

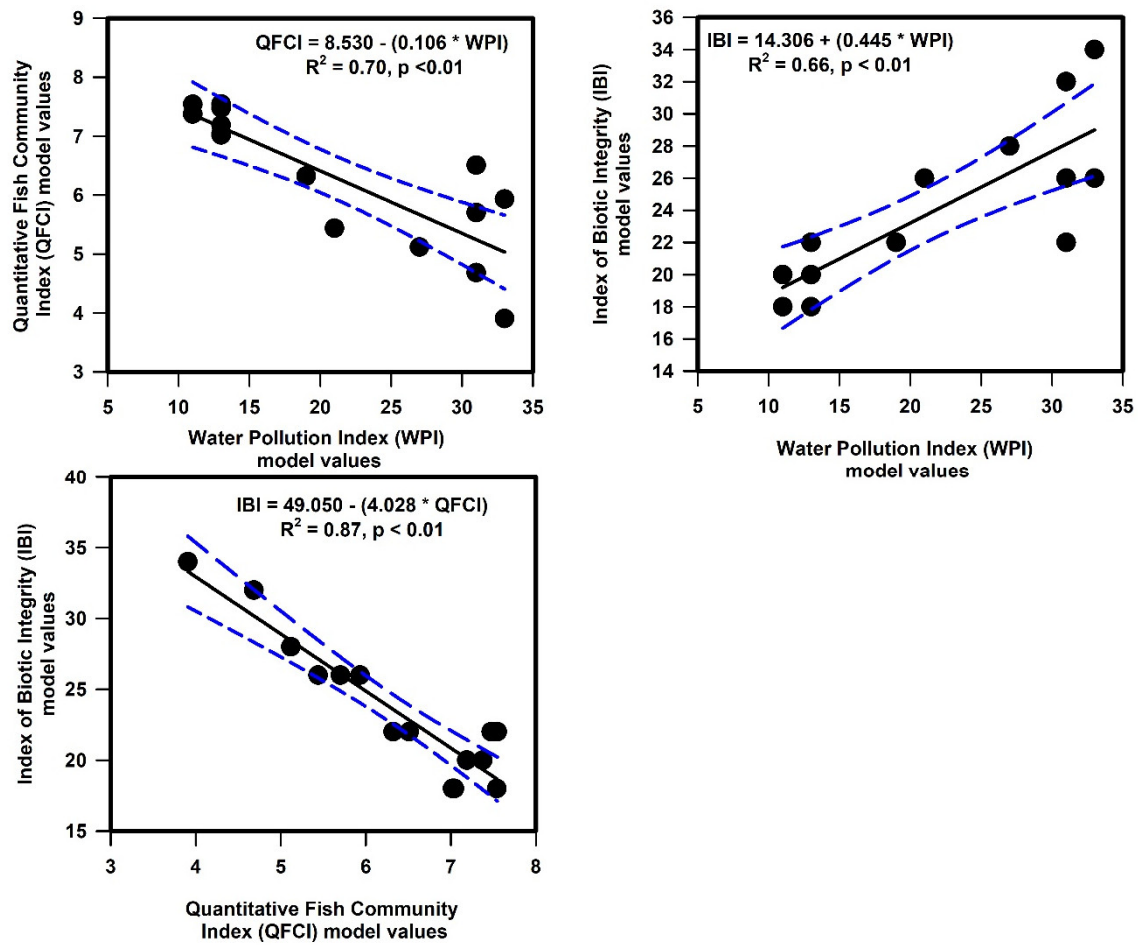

Figure S10. Relations among Water Pollution Index (WPI), Index of Biotic Integrity (IBI) and Quantitative Fish Community Index (QFCI) model values.



Table S1. Mann-Kendall trend analysis of water quality parameters in the Geum River basin.

(WT: water temperature, EC: electrical conductivity, TSS: total suspended solids, BOD: biological oxygen demand, COD: chemical oxygen demand, TP: total phosphorus, TN: total nitrogen, CHL-a: chlorophyll-a)

| Water Quality parameters | S value | P-value | Slope | Intercept | Trend            | Sign |
|--------------------------|---------|---------|-------|-----------|------------------|------|
| WT                       | 10      | 0.17    | 0.09  | 14.31     | No trend         | ↔    |
| EC                       | 20      | 0.02    | 11.15 | 196.87    | Increasing trend | ↑    |
| TSS                      | -12     | 0.12    | -0.92 | 15.75     | No trend         | ↔    |
| BOD                      | 20      | 0.02    | 0.06  | 1.52      | Increasing trend | ↑    |
| COD                      | 18      | 0.03    | 0.10  | 4.93      | Increasing trend | ↑    |
| TP                       | 4       | 0.37    | -1.75 | 65.99     | No trend         | ↔    |
| TN                       | -4      | 0.37    | -0.01 | 2.87      | No trend         | ↔    |
| TN:TP                    | 2       | 0.45    | -0.05 | 93.33     | No trend         | ↔    |
| CHL-a                    | 30      | 0.00    | 1.09  | 14.53     | Increasing trend | ↑    |

Table S2. Fish fauna and guild composition in the Geum River watershed. (Tol.G.: tolerance guild, Tro. G.: trophic guild, Hab. G.: habitat guild, RA: relative abundance, TNI: total number of individuals, TRA: total relative abundance, TNS: total number of species, ¥: exotic species, \*: endangered species, SS: sensitive species, IS: intermediate species, TS: tolerant species, O: omnivores, I: insectivores, C: carnivores, H: herbivores, RB: riffle benthic species)

| Species                                    | Type of Fish Guild |         |         | Relative abundance of fish species (RA, %) |       |       |       |       |       |       |       |       |       |       |       |       |       |       | TNI  | TRA(%) |
|--------------------------------------------|--------------------|---------|---------|--------------------------------------------|-------|-------|-------|-------|-------|-------|-------|-------|-------|-------|-------|-------|-------|-------|------|--------|
|                                            | Tol. G.            | Tro. G. | Hab. G. | S01                                        | S02   | S03   | S04   | S05   | S06   | S07   | S08   | S09   | S10   | S11   | S12   | S13   | S14   | S15   |      |        |
| <i>Zacco platypus</i>                      | TS                 | O       |         | 44.49                                      | 13.22 | 27.45 | 39.66 | 35.70 | 32.42 | 14.03 | 39.03 | 29.77 | 7.40  | 30.08 | 4.72  | 3.36  | 5.13  | 5.79  | 5696 | 25.62  |
| <i>Pseudogobio esocinus</i>                | IS                 | I       |         | 4.00                                       | 0.60  | 0.79  | 6.23  | 2.78  | 3.55  | 7.84  | 9.46  | 15.96 | 10.99 | 9.08  | 9.78  | 13.02 | 9.09  | 8.15  | 1398 | 6.29   |
| <i>Zacco koreanus</i>                      | SS                 | I       |         | 7.59                                       | 23.13 | 12.64 | 0.06  | 12.52 | 2.18  | 0.78  | 0.63  |       |       |       |       |       |       |       | 1305 | 5.87   |
| <i>Pungtungia herzi</i>                    | IS                 | I       |         | 6.81                                       | 8.67  | 14.35 | 10.31 | 7.04  | 3.28  | 7.45  | 0.91  | 0.08  | 0.24  |       |       |       |       |       | 1113 | 5.01   |
| <i>Hemibarbus labeo</i>                    | TS                 | I       |         | 1.22                                       | 0.00  | 1.45  | 1.22  | 0.52  | 1.47  | 7.52  | 8.48  | 11.41 | 14.41 | 5.66  | 6.35  | 6.58  | 5.59  | 9.66  | 956  | 4.30   |
| <i>Acheilognathus lanceolata</i>           | IS                 | O       |         |                                            | 0.12  | 2.04  | 5.47  | 2.70  | 2.07  | 27.43 | 7.85  | 1.68  | 2.39  | 6.70  | 2.56  | 3.36  |       |       | 900  | 4.05   |
| <i>Acheilognathus yamatsutae</i>           | IS                 | O       |         | 0.04                                       | 3.64  | 5.46  | 8.10  | 13.22 | 12.61 | 1.80  | 1.26  |       |       | 0.30  |       |       |       |       | 894  | 4.02   |
| <i>Microphysogobio jeoni</i>               | IS                 | I       |         |                                            |       |       |       |       |       |       |       | 0.08  | 5.73  | 4.62  | 36.11 | 9.26  | 3.96  | 5.58  | 867  | 3.90   |
| <i>Rhinogobius brunneus</i>                | IS                 | I       | RB      | 10.07                                      | 0.08  | 0.20  | 1.05  | 0.61  | 5.51  | 3.21  | 8.83  | 1.12  | 1.59  | 7.37  | 6.00  | 3.89  | 0.70  | 1.93  | 829  | 3.73   |
| <i>Opsariichthys uncirostris amurensis</i> | TS                 | C       |         | 3.43                                       |       | 0.53  | 0.76  | 0.17  | 2.46  |       | 2.73  | 6.30  | 2.79  | 3.35  | 12.29 | 22.01 | 12.82 | 7.73  | 818  | 3.68   |
| <i>Acheilognathus koreensis</i>            | IS                 | O       |         | 0.16                                       | 21.97 | 5.07  | 0.82  | 3.09  | 0.55  |       |       |       |       |       |       |       |       |       | 726  | 3.27   |
| <i>Squalidus japonicus coreanus</i>        | TS                 | O       |         | 0.04                                       |       |       |       |       | 0.16  | 0.16  | 0.84  | 2.15  | 11.31 | 8.71  | 8.10  | 8.86  | 16.78 | 11.16 | 633  | 2.85   |
| <i>Coreoleuciscus splendidus</i>           | SS                 | I       | RB      | 4.24                                       | 6.83  | 8.03  | 1.69  | 1.17  | 1.31  | 0.31  | 0.63  |       |       |       |       |       |       |       | 490  | 2.20   |
| <i>Carassius auratus</i>                   | TS                 | O       |         | 0.04                                       |       | 0.07  | 2.62  | 0.13  | 0.38  | 7.76  | 0.70  | 11.97 | 5.73  | 1.12  | 0.41  | 1.74  | 2.80  | 4.08  | 454  | 2.04   |
| <i>Pseudopungtungia nigra</i> *            | SS                 | I       |         |                                            | 7.67  | 5.40  | 0.35  | 2.04  | 3.00  |       |       |       |       |       |       |       |       |       | 382  | 1.72   |
| <i>Hemibarbus longirostris</i>             | IS                 | I       |         | 4.00                                       | 0.80  | 2.24  | 2.74  | 1.13  | 2.40  | 2.82  | 1.40  | 0.08  | 0.80  | 0.97  | 0.29  | 1.61  |       | 0.21  | 367  | 1.65   |
| <i>Squaliobarbus curriculus</i>            | IS                 | O       |         |                                            |       |       |       |       | 0.11  | 0.63  | 0.21  | 0.64  | 2.79  | 2.76  | 3.61  | 4.43  | 24.24 | 15.24 | 363  | 1.63   |

|                                        |    |   |    |      |      |      |      |      |      |      |      |      |       |      |      |      |      |       |     |      |
|----------------------------------------|----|---|----|------|------|------|------|------|------|------|------|------|-------|------|------|------|------|-------|-----|------|
| <i>Micropterus salmoides</i> ♀         | TS | C |    | 1.31 |      | 1.51 | 1.81 | 0.04 | 0.55 | 1.18 | 1.33 | 1.36 | 4.94  | 4.91 | 0.76 | 2.55 | 3.73 | 7.08  | 357 | 1.61 |
| <i>Sarcocheilichthys variegatus</i>    | SS | I |    |      | 0.08 | 2.37 | 4.31 | 2.91 | 5.51 | 0.00 | 0.56 | 0.08 |       | 0.30 |      |      |      |       | 293 | 1.32 |
| <i>Squalidus chankaensis tsuchigae</i> | IS | O |    | 0.08 |      |      |      | 1.04 | 6.33 | 0.39 | 0.42 | 0.72 | 3.26  | 1.79 | 1.40 | 5.37 |      | 0.21  | 292 | 1.31 |
| <i>Microphysogobio yaluensis</i>       | IS | O | RB | 5.10 | 0.04 | 1.25 | 0.29 | 1.87 | 3.06 | 0.08 | 0.77 | 0.80 | 0.08  |      | 0.12 |      |      |       | 274 | 1.23 |
| <i>Zacco temminckii</i>                | SS | I |    | 0.69 | 6.47 | 2.04 |      | 1.43 | 0.60 |      |      |      |       |      |      |      |      |       | 254 | 1.14 |
| <i>Hemiculter eigenmanni</i>           | TS | O |    |      |      |      |      |      | 3.71 | 0.08 | 0.00 | 0.40 | 2.87  | 3.28 | 1.63 | 6.31 | 0.23 | 0.86  | 234 | 1.05 |
| <i>Odontobutis interrupta</i>          | IS | C |    | 0.12 |      | 0.59 | 3.44 | 1.61 | 0.44 | 3.61 | 2.94 | 1.60 | 0.24  | 0.52 |      |      |      |       | 234 | 1.05 |
| <i>Tridentiger brevispinis</i>         | IS | I | RB | 0.08 |      |      |      | 0.13 | 0.55 | 3.61 | 3.99 | 0.16 | 0.32  | 1.34 | 0.35 | 0.81 | 6.06 | 7.30  | 214 | 0.96 |
| <i>Erythroculter erythropterus</i>     | TS | C |    |      |      |      |      |      |      | 0.24 | 0.28 | 1.68 | 0.80  | 0.60 | 3.84 | 3.89 | 4.43 | 10.73 | 210 | 0.94 |
| <i>Coreoperca herzi</i>                | SS | C |    | 0.53 | 3.00 | 1.71 | 1.34 | 1.91 | 0.93 | 0.08 |      |      |       |      |      |      |      |       | 199 | 0.89 |
| <i>Lepomis macrochirus</i> ♀           | TS | I |    |      |      |      | 0.06 | 0.26 | 0.11 | 0.94 | 0.28 | 0.32 | 12.10 |      |      | 0.67 |      |       | 186 | 0.84 |
| <i>Pseudorasbora parva</i>             | TS | O |    |      |      |      | 0.29 | 0.04 | 0.00 | 0.71 | 0.42 | 8.06 | 0.32  | 1.19 | 0.41 | 0.81 | 0.23 | 0.64  | 159 | 0.72 |
| <i>Odontobutis platycephala</i>        | SS | C |    | 0.57 | 0.92 | 0.92 | 0.82 | 1.26 | 0.44 | 0.47 | 0.21 |      |       | 0.07 |      |      |      |       | 112 | 0.50 |
| <i>Sarcocheilichthys nigripinnis</i>   | IS | I |    |      | 0.04 | 0.39 | 0.99 | 1.78 | 0.33 | 0.24 | 0.63 |      |       | 0.89 |      |      | 0.93 |       | 99  | 0.45 |
| <i>Iksookimia koreensis</i>            | IS | I | RB | 1.96 | 1.04 | 0.39 | 0.00 | 0.13 | 0.11 | 0.00 |      |      |       | 0.00 |      |      |      |       | 85  | 0.38 |
| <i>Acheilognathus rhombeus</i>         | IS | O |    |      |      | 0.39 | 1.05 | 0.04 | 2.46 | 0.00 | 0.56 |      | 0.16  | 0.15 |      |      |      |       | 82  | 0.37 |
| <i>Rhinogobius giurinus</i>            | TS | O |    |      |      |      |      |      | 0.11 | 0.24 | 0.56 |      | 0.56  | 0.97 | 0.93 |      | 1.63 | 0.64  | 59  | 0.27 |
| <i>Acanthorhodeus chankaensis</i>      | IS | O |    |      |      |      |      |      | 0.16 | 2.51 | 0.00 | 0.48 | 0.48  | 0.52 |      | 0.40 | 0.23 |       | 58  | 0.26 |
| <i>Rhodeus uyekii</i>                  | IS | C |    |      | 0.64 | 1.25 | 0.29 | 0.57 |      |      |      |      | 0.08  |      |      |      |      |       | 54  | 0.24 |
| <i>Pseudobagrus koreanus</i>           | SS | I | RB | 0.16 | 0.32 | 0.46 |      | 1.00 |      |      | 0.77 |      |       |      |      |      |      |       | 53  | 0.24 |
| <i>Siniperca scherzeri</i>             | SS | C |    | 0.73 | 0.08 | 0.20 | 0.99 | 0.09 | 0.27 | 0.00 | 0.21 | 0.08 | 0.08  | 0.07 |      |      |      |       | 53  | 0.24 |
| <i>Rhodeus notatus</i>                 | IS | O |    |      |      |      | 0.93 | 0.26 |      | 1.18 | 0.07 |      | 0.56  | 0.37 |      |      |      |       | 50  | 0.22 |
| <i>Cyprinus carpio</i>                 | TS | O |    |      |      |      | 0.17 |      |      | 0.55 | 0.35 | 0.48 | 1.59  | 0.37 |      | 0.13 |      | 0.21  | 48  | 0.22 |

|                                   |    |   |    |       |       |      |      |      |      |      |      |       |      |       |      |      |       |       |    |       |
|-----------------------------------|----|---|----|-------|-------|------|------|------|------|------|------|-------|------|-------|------|------|-------|-------|----|-------|
| <i>Acheilognathus macropterus</i> | IS | O |    |       |       |      | 0.12 |      | 0.05 | 0.00 | 0.35 | 0.64  | 1.51 | 0.45  | 0.00 | 0.00 | 0.70  | 0.21  | 45 | 0.20  |
| <i>Gnathopogon strigatus</i>      | IS | I |    |       |       |      |      |      | 0.11 | 0.24 | 1.47 | 0.80  | 0.40 |       |      |      |       |       | 41 | 0.18  |
| <i>Rhynchocypris oxycephalus</i>  | SS | I |    | 0.73  |       |      |      |      |      |      |      | 0.08  | 1.67 |       |      |      |       |       | 40 | 0.18  |
| <i>Squalidus gracilis majimae</i> | SS | I |    | 0.29  | 0.08  | 0.13 |      | 0.04 | 0.11 |      |      | 0.16  | 0.16 | 0.97  |      | 0.40 |       |       | 34 | 0.15  |
| <i>Misgurnus anguillicaudatus</i> | TS | O |    | 0.41  |       |      | 0.06 |      |      | 1.33 | 0.07 | 0.16  |      |       | 0.06 | 0.13 |       |       | 33 | 0.15  |
| <i>Pseudobagrus fulvidraco</i>    | TS | I |    |       |       |      | 0.82 | 0.09 | 0.55 | 0.08 |      | 0.08  |      |       |      | 0.40 | 0.23  | 0.21  | 33 | 0.15  |
| <i>Misgurnus mizolepis</i>        | TS | O |    | 0.16  | 0.12  |      | 0.06 | 0.09 |      | 0.47 | 0.21 | 0.24  | 0.16 |       | 0.06 |      |       |       | 25 | 0.11  |
| <i>Plecoglossus altivelis</i>     | IS | H |    | 0.90  |       |      |      |      |      |      |      |       |      |       |      |      |       |       | 22 | 0.10  |
| <i>Abbottina rivularis</i>        | TS | O |    |       |       |      |      |      |      |      |      | 0.16  | 0.48 | 0.45  | 0.23 |      |       |       | 18 | 0.08  |
| <i>Gobiobotia brevibarba*</i>     | SS | I | RB |       | 0.08  | 0.53 |      | 0.22 |      |      |      |       |      |       |      |      |       |       | 15 | 0.07  |
| <i>Carassius cuvieri</i><br>¥     | TS | O |    |       |       |      | 0.29 |      |      |      | 0.14 | 0.08  | 0.24 |       |      |      |       |       | 11 | 0.05  |
| <i>Macropodus ocellatus</i>       | TS | I |    |       |       |      | 0.58 |      |      |      |      |       |      |       |      |      |       |       | 10 | 0.04  |
| <i>Oryzias sinensis</i>           | TS | O |    |       | 0.16  |      |      |      |      |      |      |       |      |       |      |      |       | 1.29  | 10 | 0.04  |
| <i>Rhodeus ocellatus</i>          | IS | O |    |       |       |      |      |      |      |      |      |       | 0.72 |       |      |      |       |       | 9  | 0.04  |
| <i>Channa argus</i>               | TS | C |    |       |       | 0.07 | 0.17 |      |      |      | 0.07 | 0.08  |      |       |      |      |       |       | 6  | 0.03  |
| <i>Cobitis choii</i>              | SS | I |    |       |       |      |      |      |      |      | 0.35 |       |      |       |      |      |       |       | 5  | 0.02  |
| <i>Silurus asotus</i>             | TS | C |    |       |       |      | 0.06 | 0.09 |      | 0.08 |      |       |      |       |      |      | 0.23  |       | 5  | 0.02  |
| <i>Liobagrus obesus</i>           | SS | I | RB |       |       |      |      | 0.17 |      |      |      |       |      |       |      |      |       |       | 4  | 0.02  |
| <i>Tridentiger obscurus</i>       | TS | I |    |       |       |      |      |      |      |      |      |       |      |       |      |      |       | 0.86  | 4  | 0.02  |
| <i>Leiocassis ussuriensis</i>     | IS | I |    |       | 0.04  |      |      | 0.09 |      |      |      |       |      |       |      |      |       |       | 3  | 0.01  |
| <i>Oryzias latipes</i>            | TS | O |    |       | 0.12  |      |      |      |      |      |      |       |      |       |      |      |       |       | 3  | 0.01  |
| <i>Hypomesus nipponensis</i>      | IS | I |    |       |       |      |      |      |      |      |      | 0.080 |      | 0.074 |      |      |       |       | 2  | 0.009 |
| <i>Liobagrus mediadiposalis</i>   | SS | I | RB | 0.041 | 0.040 |      |      |      |      |      |      |       |      |       |      |      |       |       | 2  | 0.009 |
| <i>Mugil cephalus</i>             | TS | H |    |       |       |      |      |      |      |      |      |       |      |       |      |      | 0.233 | 0.215 | 2  | 0.009 |

|                                 |    |   |    |      |      |       |      |      |       |      |      |      |       |      |      |     |     |     |        |       |
|---------------------------------|----|---|----|------|------|-------|------|------|-------|------|------|------|-------|------|------|-----|-----|-----|--------|-------|
| <i>Cobitis nalbanti</i>         | IS | I |    |      |      |       |      |      | 0.055 |      |      |      |       |      |      |     |     |     | 1      | 0.004 |
| <i>Gobiobotia macrocephala*</i> | SS | I | RB |      |      | 0.066 |      |      |       |      |      |      |       |      |      |     |     |     | 1      | 0.004 |
| <i>Gobiobotia nakdongensis*</i> | SS | I | RB |      |      |       |      |      |       |      |      |      | 0.080 |      |      |     |     |     | 1      | 0.004 |
| TNS                             |    |   |    | 30   | 28   | 31    | 36   | 39   | 38    | 34   | 38   | 36   | 37    | 32   | 22   | 23  | 21  | 23  |        |       |
| TNI                             |    |   |    | 2452 | 2503 | 1519  | 1717 | 2300 | 1832  | 1276 | 1427 | 1253 | 1256  | 1343 | 1717 | 745 | 429 | 466 | 22,235 |       |

Table S3. Sites-based Chemical health assessment (CHA) based on multi-metric water pollution index (WPI) in the Geum River basin. (EX: excellent, G: good, F: fair, P: poor, VP: very poor.

| Category                     | Model Metric                                                   | Scoring Criteria |         |      | Geum River   |              |              |              |              |              |              |              |              |              |              |              |              |              |              |
|------------------------------|----------------------------------------------------------------|------------------|---------|------|--------------|--------------|--------------|--------------|--------------|--------------|--------------|--------------|--------------|--------------|--------------|--------------|--------------|--------------|--------------|
|                              |                                                                | 5                | 3       | 1    | S01          | S02          | S03          | S04          | S05          | S06          | S07          | S08          | S09          | S10          | S11          | S12          | S13          | S14          | S15          |
| Nutrient regime              | M <sub>1</sub> : total nitrogen (mgL <sup>-1</sup> )           | <1.5             | 1.5-3.0 | >3   | 3.33<br>(1)  | 1.57<br>(3)  | 1.73<br>(3)  | 1.80<br>(3)  | 2.49<br>(3)  | 1.90<br>(3)  | 1.51<br>(3)  | 3.67<br>(1)  | 3.93<br>(1)  | 3.67<br>(1)  | 3.45<br>(1)  | 3.40<br>(1)  | 3.32<br>(1)  | 3.34<br>(1)  | 3.16<br>(1)  |
|                              | M <sub>2</sub> : total phosphorus (µgL <sup>-1</sup> )         | <30              | 30-100  | >100 | 48.57<br>(3) | 15.44<br>(5) | 21.48<br>(5) | 19.75<br>(5) | 29.98<br>(5) | 18.37<br>(5) | 19.32<br>(5) | 75.67<br>(3) | 93.44<br>(3) | 85.14<br>(3) | 84.77<br>(3) | 85.18<br>(3) | 81.78<br>(3) | 94.02<br>(3) | 84.68<br>(3) |
|                              | M <sub>3</sub> : TN:TP ratio                                   | >50              | 20-50   | <20  | 108.1<br>(5) | 151.2<br>(5) | 145.5<br>(5) | 154.3<br>(5) | 135.1<br>(5) | 183.1<br>(5) | 114.5<br>(5) | 58.2<br>(5)  | 50.6<br>(5)  | 50.9<br>(5)  | 55.1<br>(5)  | 51.4<br>(5)  | 52.2<br>(5)  | 41.5<br>(3)  | 45.2<br>(3)  |
| Organic matter               | M <sub>4</sub> : biological oxygen demand (mgL <sup>-1</sup> ) | <1               | 1-2.5   | >2.5 | 1.14<br>(3)  | 0.82<br>(5)  | 0.76<br>(5)  | 0.74<br>(5)  | 0.93<br>(5)  | 0.72<br>(5)  | 0.73<br>(5)  | 1.95<br>(3)  | 2.62<br>(1)  | 2.73<br>(1)  | 2.71<br>(1)  | 2.94<br>(1)  | 2.68<br>(1)  | 2.84<br>(1)  | 3.09<br>(1)  |
| Ionic contents and solids    | M <sub>5</sub> : total suspended solid (mgL <sup>-1</sup> )    | <4               | 4-10    | >10  | 8.32<br>(3)  | 1.53<br>(5)  | 4.02<br>(3)  | 4.11<br>(3)  | 6.65<br>(3)  | 3.20<br>(5)  | 3.13<br>(5)  | 9.14<br>(3)  | 16.00<br>(1) | 14.79<br>(1) | 18.37<br>(1) | 17.55<br>(1) | 18.66<br>(1) | 21.18<br>(1) | 20.20<br>(1) |
|                              | M <sub>6</sub> : electrical conductivity (µScm <sup>-1</sup> ) | <180             | 180-300 | >300 | 184.7<br>(3) | 107.8<br>(5) | 126.0<br>(5) | 140.3<br>(5) | 180.6<br>(3) | 158.1<br>(5) | 153.3<br>(5) | 289.6<br>(3) | 382.9<br>(1) | 370.5<br>(1) | 346.9<br>(1) | 350.4<br>(1) | 334.1<br>(1) | 336.8<br>(1) | 321.6<br>(1) |
| Primary production indicator | M <sub>7</sub> : chlorophyll (µg l <sup>-1</sup> )             | <3               | 3-10    | >10  | 6.37<br>(3)  | 1.81<br>(5)  | 2.25<br>(5)  | 2.05<br>(5)  | 3.36<br>(3)  | 1.96<br>(5)  | 3.63<br>(3)  | 12.61<br>(1) | 31.14<br>(1) | 43.07<br>(1) | 35.73<br>(1) | 40.13<br>(1) | 34.76<br>(1) | 36.18<br>(1) | 44.86<br>(1) |
| CHA Scores                   |                                                                |                  |         |      | 21           | 33           | 31           | 31           | 27           | 33           | 31           | 19           | 13           | 13           | 13           | 13           | 13           | 11           | 11           |
| Chemical Status of the River |                                                                |                  |         |      | F            | EX           | EX           | EX           | G            | EX           | EX           | F            | P            | P            | P            | P            | P            | VP           | VP           |



Table S4. Yearly Chemical health assessment (CHA) based on multi-metric water pollution index (WPI) in the Geum River basin. (F: fair, P: poor).

| Category                     | Model Metric                                                   | Scoring Criteria |         |      | Geum River   |              |              |              |              |              |              |              |              |
|------------------------------|----------------------------------------------------------------|------------------|---------|------|--------------|--------------|--------------|--------------|--------------|--------------|--------------|--------------|--------------|
|                              |                                                                | 5                | 3       | 1    | 2011         | 2012         | 2013         | 2014         | 2015         | 2016         | 2017         | 2018         | 2019         |
| Nutrient regime              | M <sub>1</sub> : total nitrogen (mgL <sup>-1</sup> )           | <1.5             | 1.5-3.0 | >3   | 3.13<br>(1)  | 2.91<br>(3)  | 2.63<br>(3)  | 2.69<br>(3)  | 2.48<br>(3)  | 3.01<br>(1)  | 2.82<br>(3)  | 2.95<br>(3)  | 2.76<br>(3)  |
|                              | M <sub>2</sub> : total phosphorus (µgL <sup>-1</sup> )         | <30              | 30-100  | >100 | 90.89<br>(3) | 60.11<br>(3) | 48.35<br>(3) | 48.78<br>(3) | 39.99<br>(3) | 52.08<br>(3) | 54.07<br>(3) | 59.58<br>(3) | 61.34<br>(3) |
|                              | M <sub>3</sub> : TN:TP ratio                                   | >50              | 20-50   | <20  | 83.6<br>(5)  | 91.4<br>(5)  | 96.1<br>(5)  | 97.3<br>(5)  | 92.5<br>(5)  | 96.6<br>(5)  | 118.1<br>(5) | 85.4<br>(5)  | 76.4<br>(5)  |
| Organic matter               | M <sub>4</sub> : biological oxygen demand (mgL <sup>-1</sup> ) | <1               | 1-2.5   | >2.5 | 1.73<br>(3)  | 1.65<br>(3)  | 1.65<br>(3)  | 1.79<br>(3)  | 1.64<br>(3)  | 1.89<br>(3)  | 1.84<br>(3)  | 2.06<br>(3)  | 2.21<br>(3)  |
| Ionic contents and solids    | M <sub>5</sub> : total suspended solid (mgL <sup>-1</sup> )    | <4               | 4-10    | >10  | 20.68<br>(1) | 14.60<br>(1) | 9.65<br>(3)  | 9.92<br>(3)  | 6.39<br>(3)  | 8.47<br>(3)  | 9.03<br>(3)  | 11.88<br>(1) | 9.51<br>(3)  |
|                              | M <sub>6</sub> : electrical conductivity (µScm <sup>-1</sup> ) | <180             | 180-300 | >300 | 207.5<br>(3) | 203.3<br>(3) | 214.9<br>(3) | 243.8<br>(3) | 267.6<br>(3) | 299.7<br>(3) | 292.4<br>(3) | 279.8<br>(3) | 264.7<br>(3) |
| Primary production indicator | M <sub>7</sub> : chlorophyll (µg l <sup>-1</sup> )             | <3               | 3-10    | >10  | 14.53<br>(1) | 16.05<br>(1) | 18.24<br>(1) | 18.90<br>(1) | 20.63<br>(1) | 25.72<br>(1) | 20.93<br>(1) | 21.20<br>(1) | 24.12<br>(1) |
| CHA Scores                   |                                                                |                  |         |      | 17           | 19           | 21           | 21           | 21           | 19           | 21           | 19           | 21           |
| Chemical Status of the River |                                                                |                  |         |      | P            | F            | F            | F            | F            | F            | F            | F            | F            |

Table S5. Sites-based Biological health assessment (BHA), based on the index of biotic integrity (IBI<sub>KR</sub>) using fish assemblages in the Geum River Basin. (F: fair, G: good, P: poor)

| Model Category                   | Model Metric                                                | Scoring Criteria                                                                |        |      | Geum River   |              |              |              |              |              |              |              |              |              |              |              |              |              |              |
|----------------------------------|-------------------------------------------------------------|---------------------------------------------------------------------------------|--------|------|--------------|--------------|--------------|--------------|--------------|--------------|--------------|--------------|--------------|--------------|--------------|--------------|--------------|--------------|--------------|
|                                  |                                                             | 5                                                                               | 3      | 1    | S01          | S02          | S03          | S04          | S05          | S06          | S07          | S08          | S09          | S10          | S11          | S12          | S13          | S14          | S15          |
| Species richness and composition | M1: total number of native fish species                     | Expectations of M <sub>1</sub> -M <sub>3</sub> vary with stream size and region |        |      | 29<br>(5)    | 28<br>(5)    | 31<br>(5)    | 33<br>(5)    | 37<br>(5)    | 36<br>(5)    | 32<br>(5)    | 35<br>(5)    | 33<br>(5)    | 34<br>(5)    | 31<br>(5)    | 21<br>(5)    | 21<br>(5)    | 20<br>(5)    | 22<br>(5)    |
|                                  | M2: number of riffle benthic species                        |                                                                                 |        |      | 7<br>(5)     | 7<br>(5)     | 7<br>(5)     | 3<br>(3)     | 7<br>(5)     | 5<br>(3)     | 4<br>(3)     | 5<br>(3)     | 3<br>(1)     | 4<br>(3)     | 2<br>(1)     | 3<br>(1)     | 2<br>(1)     | 2<br>(1)     | 2<br>(1)     |
|                                  | M3: number of sensitive species                             |                                                                                 |        |      | 10<br>(5)    | 12<br>(5)    | 12<br>(5)    | 7<br>(5)     | 12<br>(5)    | 9<br>(5)     | 4<br>(1)     | 7<br>(3)     | 4<br>(1)     | 4<br>(1)     | 4<br>(1)     | 0<br>(1)     | 1<br>(1)     | 0<br>(1)     | 0<br>(1)     |
|                                  | M4: proportion of individuals as tolerant species           | <5%                                                                             | 5-20%  | >20% | 51.10<br>(1) | 13.62<br>(3) | 31.28<br>(1) | 48.63<br>(1) | 31.73<br>(1) | 41.92<br>(1) | 35.29<br>(1) | 55.50<br>(1) | 74.70<br>(1) | 65.68<br>(1) | 60.69<br>(1) | 39.78<br>(1) | 57.45<br>(1) | 54.08<br>(1) | 61.69<br>(1) |
| Trophic composition              | M5: proportion of individuals as omnivore species           | <20%                                                                            | 20-45% | >45% | 50.53<br>(1) | 39.39<br>(3) | 42.61<br>(3) | 60.22<br>(1) | 58.87<br>(1) | 64.19<br>(1) | 59.37<br>(1) | 53.82<br>(1) | 58.42<br>(1) | 42.68<br>(3) | 59.20<br>(1) | 24.23<br>(3) | 34.90<br>(3) | 51.98<br>(1) | 40.34<br>(3) |
|                                  | M6: proportion of individuals as native insectivore species | >45%                                                                            | 20-45% | <20% | 41.88<br>(3) | 56.61<br>(5) | 51.82<br>(5) | 30.36<br>(3) | 35.79<br>(3) | 30.66<br>(3) | 34.44<br>(3) | 38.23<br>(3) | 30.26<br>(3) | 41.39<br>(3) | 31.27<br>(3) | 58.88<br>(5) | 36.22<br>(3) | 26.57<br>(3) | 33.91<br>(3) |

|                                                 |                                                                    |                                                                       |          |     |             |             |             |             |             |             |             |             |             |             |             |             |            |            |            |
|-------------------------------------------------|--------------------------------------------------------------------|-----------------------------------------------------------------------|----------|-----|-------------|-------------|-------------|-------------|-------------|-------------|-------------|-------------|-------------|-------------|-------------|-------------|------------|------------|------------|
| <b>Fish<br/>abundance<br/>and<br/>condition</b> | M <sub>7</sub> : total<br>number of<br>native<br>individuals       | Expectations of M <sub>7</sub><br>vary with stream size<br>and region |          |     | 2420<br>(5) | 2503<br>(5) | 1519<br>(5) | 1680<br>(5) | 2293<br>(5) | 1820<br>(5) | 1249<br>(5) | 1427<br>(5) | 1231<br>(5) | 1039<br>(5) | 1277<br>(5) | 1704<br>(5) | 721<br>(5) | 413<br>(5) | 433<br>(5) |
|                                                 | M <sub>8</sub> :<br>percent of<br>individuals<br>with<br>anomalies | 0%                                                                    | 0-<br>1% | >1% | >1<br>(1)   | <1<br>(3)   | <1<br>(3)   | <1<br>(3)   | <1<br>(3)   | <1<br>(3)   | <1<br>(3)   | >1<br>(1)   | >1<br>(1)   | >1<br>(1)   | >1<br>(1)   | >1<br>(1)   | >1<br>(1)  | >1<br>(1)  | >1<br>(1)  |
| <b>Overall IBI Scores</b>                       |                                                                    |                                                                       |          |     | <b>26</b>   | <b>34</b>   | <b>32</b>   | <b>26</b>   | <b>28</b>   | <b>26</b>   | <b>22</b>   | <b>22</b>   | <b>18</b>   | <b>22</b>   | <b>18</b>   | <b>22</b>   | <b>20</b>  | <b>18</b>  | <b>20</b>  |
| <b>Biological Health Status of the River</b>    |                                                                    |                                                                       |          |     | <b>F</b>    | <b>G</b>    | <b>G</b>    | <b>F</b>    | <b>G</b>    | <b>F</b>    | <b>F</b>    | <b>F</b>    | <b>P</b>    | <b>F</b>    | <b>P</b>    | <b>F</b>    | <b>F</b>   | <b>P</b>   | <b>F</b>   |

Table S6. Yearly biological health assessment (BHA), based on the index of biotic integrity (IBI<sub>KR</sub>) using fish assemblages in the Geum River Basin. (F: fair, G: Good)

| Model Category                        | Model Metric                                                | Scoring Criteria                                       |        |      | Geum River   |              |              |              |              |              |              |              |              |
|---------------------------------------|-------------------------------------------------------------|--------------------------------------------------------|--------|------|--------------|--------------|--------------|--------------|--------------|--------------|--------------|--------------|--------------|
|                                       |                                                             | 5                                                      | 3      | 1    | 2011         | 2012         | 2013         | 2014         | 2015         | 2016         | 2017         | 2018         | 2019         |
| Species richness and composition      | M1: total number of native fish species                     | Expectations of M1-M3 vary with stream size and region |        |      | 46<br>(5)    | 44<br>(5)    | 42<br>(5)    | 47<br>(5)    | 46<br>(5)    | 42<br>(5)    | 48<br>(5)    | 44<br>(5)    | 50<br>(5)    |
|                                       | M2: number of riffle benthic species                        |                                                        |        |      | 6<br>(3)     | 7<br>(5)     | 7<br>(5)     | 8<br>(5)     | 9<br>(5)     | 8<br>(5)     | 6<br>(5)     | 7<br>(5)     | 8<br>(5)     |
|                                       | M3: number of sensitive species                             |                                                        |        |      | 11<br>(5)    | 11<br>(5)    | 10<br>(5)    | 12<br>(5)    | 12<br>(5)    | 10<br>(5)    | 9<br>(5)     | 9<br>(5)     | 13<br>(5)    |
|                                       | M4: proportion of individuals as tolerant species           | <5%                                                    | 5-20%  | >20% | 43.35<br>(1) | 41.81<br>(1) | 34.05<br>(1) | 37.14<br>(1) | 34.26<br>(1) | 57.34<br>(1) | 45.19<br>(1) | 55.12<br>(1) | 52.07<br>(1) |
| Trophic composition                   | M5: proportion of individuals as omnivore species           | <20%                                                   | 20-45% | >45% | 56.43<br>(1) | 48.14<br>(1) | 46.26<br>(1) | 48.99<br>(1) | 38.82<br>(1) | 46.58<br>(1) | 55.17<br>(1) | 56.85<br>(1) | 52.19<br>(1) |
|                                       | M6: proportion of individuals as native insectivore species | >45%                                                   | 20-45% | <20% | 39.12<br>(3) | 43.99<br>(3) | 46.11<br>(5) | 44.48<br>(3) | 46.74<br>(5) | 38.09<br>(3) | 34.04<br>(3) | 31.63<br>(3) | 38.69<br>(3) |
| Fish abundance and condition          | M7: total number of native individuals                      | Expectations of M7 vary with stream size and region    |        |      | 3170<br>(5)  | 2483<br>(5)  | 2530<br>(5)  | 2420<br>(5)  | 2003<br>(5)  | 1920<br>(5)  | 1940<br>(5)  | 2268<br>(5)  | 2947<br>(5)  |
|                                       | M8: percent of individuals with anomalies                   | 0%                                                     | 0-1%   | >1%  | >1<br>(1)    |
| Overall IBI Scores                    |                                                             |                                                        |        |      | 24           | 26           | 28           | 26           | 28           | 26           | 26           | 26           | 26           |
| Biological Health Status of the River |                                                             |                                                        |        |      | F            | F            | G            | F            | G            | F            | F            | F            | F            |

Table S7. Canonical correspondence analysis of trophic and tolerance guilds with water quality variables and land-use pattern and elevation. IS: intermediate species, SS: sensitive species, TS: tolerant species, C: carnivore, I: Insectivores, O: omnivores, AG: agricultural land-use coverage, WT: water temperature, BOD: biological oxygen demand, COD: chemical oxygen demand, TSS: total suspended solids, TP: total phosphorus, TN: total nitrogen, CHL-a: chlorophyll-a and EC: electrical conductivity (\*p<0.05)

| Variables               | Parameters    | Axis 1 | Axis 2 |
|-------------------------|---------------|--------|--------|
| Response variables      | IS            | -0.13  | 0.24   |
|                         | SS            | 3.82   | 0.52   |
|                         | TS            | -0.72  | -0.32  |
|                         | C             | -1.23  | 2.84   |
|                         | I             | 0.35   | 0.74   |
|                         | O             | 0.01   | -1.24  |
| Environmental Variables | % AG          | -0.03  | 0.24   |
|                         | % Forest      | 0.56   | -0.27  |
|                         | % Built-up    | -0.61  | 0.12   |
|                         | Elevation (m) | 0.72   | -0.10  |
|                         | WT            | -0.23  | 0.39   |
|                         | BOD           | -0.74  | 0.39   |
|                         | COD           | -0.78  | 0.32   |
|                         | TSS           | -0.76  | 0.37   |
|                         | TN            | -0.68  | 0.08   |
|                         | TP            | -0.76  | 0.25   |
|                         | TN:TP         | 0.75   | -0.30  |
|                         | CHL-a         | -0.72  | 0.41   |
|                         | EC            | -0.79  | 0.19   |
| % of variance           |               | 72*    | 14.6   |
| Cumulative %            |               | 72     | 86.6   |
